# Supplementary material for: Tuck-KGC: based on tensor decomposition for diabetes knowledge graph completion model integrating Chinese and Western medicine
Source: PeerJ journal article supplement (doi:10.7717/peerj-cs.2522), 2025-02-19
Supplement: Appendix.pdf [file Appendix.pdf]

## Appendix A

Referring to the characteristics of traditional Chinese and Western medicine diagnosis and treatment, TCM syndrome differentiation is combined with Western medicine disease differentiation. Syndrome differentiation refers to summarizing symptoms and then determining treatment methods and specific prescriptions based on symptoms; disease differentiation refers to deducing the disease from symptoms, and then the relevant syndromes are derived from the disease, and finally the treatment methods and specific prescriptions are determined by the syndromes. According to the characteristics of diabetes, combined with the relationship between the biochemical test indicators of Western medicine and the disease, as well as the three classifications of diabetes in Traditional Chinese Medicine, at the entity concept level, it is divided according to the "Ten High and One Low" of Traditional Chinese Medicine and the classification definition of Western Medicine. There are twelve specific categories and their relationships. See Table A1, Table A2, Table A3.

Table A1: Common entity categories of Chinese and Western medicine and their explanations

| Entity type             | Type explanation                                     |
|-------------------------|------------------------------------------------------|
| Cause                   | Causes and risk factors of disease                   |
| Clinical manifestations | Symptoms and signs                                   |
| Drug                    | Routine medication                                   |
| Medication frequency    | Medication frequency                                 |
| Duration                | Duration of symptoms and duration of medication      |
| Storage                 | storage method                                       |
| Medication method       | time, oral, injection, etc.                          |
| non-drug treatment      | radiotherapy, traditional Chinese medicine treatment |
| Degree                  | severity of illness                                  |
| Adverse reactions       | Adverse reactions after treatment                    |
| Part                    | body part, biological tissue                         |
| Dosage                  | usage amount                                         |

Table A2: Western medicine entity categories and their explanations

| Entity type              | Type explanation                                      |
|--------------------------|-------------------------------------------------------|
| Medicine property        | Traditional Chinese Medicine's Understanding of Drugs |
| Source                   | Source                                                |
| Meridian tropism         | Part of the body where the drug acts                  |
| Chinese prescription     | Traditional Chinese Medicine Treatment Prescriptions  |
| Chinese treatment        | Traditional Chinese Medicine Treatment                |
| Addition and subtraction | Medication adjustment                                 |

Table A3: Traditional Chinese Medicine entity categories and their explanations

| Entity type                    | Type explanation                     |
|--------------------------------|--------------------------------------|
| Inspection Method              | laboratory tests, Film degree exam   |
| Biochemical test indicators    | Indicator value                      |
| OCT type                       | Prescription, Non-prescription drugs |
| Drug regulatory classification | Level 1, 2, and 3                    |
